# Supplementary material for: Al-doped H2TiO3 ion sieve with enhanced Li+ adsorption performance
Source: Royal Society of Chemistry journal article supplement (doi:10.1039/d1ra06535a), 2021-01-01
Supplement: d1ra06535a1.pdf [file d1ra06535a1.pdf]

## Al-doped $\text{H}_2\text{TiO}_3$ ion sieve with enhanced $\text{Li}^+$ adsorption performance

Xianyang Dai<sup>a, b, c</sup>, Honglong Zhan<sup>a, b, c</sup>, Zhiqiang Qian<sup>a, b, \*</sup>, Jun Li<sup>a, b</sup>, Zhong Liu<sup>a, b, \*</sup>, Zhijian Wu<sup>a, b</sup>

<sup>a</sup> Key Laboratory of Comprehensive and Highly Efficient Utilization of Salt Lake Resources,

Qinghai Institute of Salt Lakes, Chinese Academy of Sciences, Xining 810008, China

<sup>b</sup> Key Laboratory of Salt Lake Resources Chemistry of Qinghai Province, Xining 810008, China

<sup>c</sup> University of Chinese Academy of Sciences, Beijing 100049, China

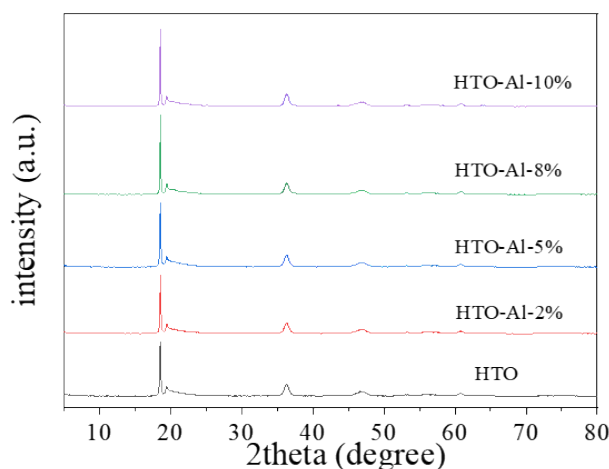

Fig. S1 XRD patterns of HTO and HTO-Al-x.

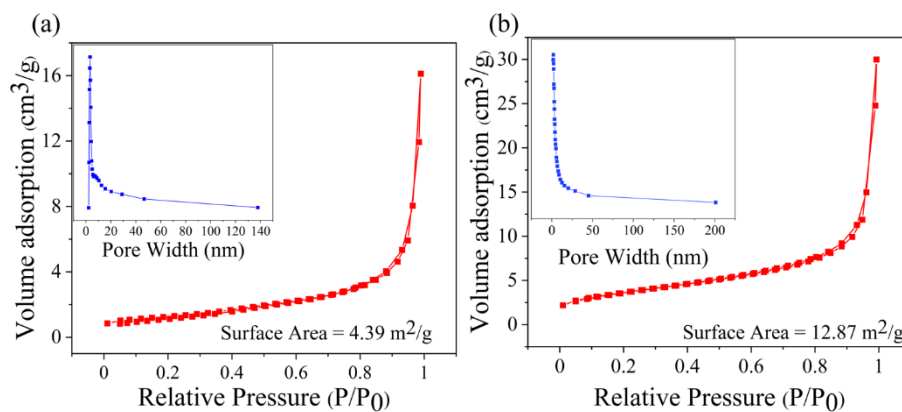

Fig. S2 Nitrogen adsorption/desorption isotherms and pore size distribution of (a) undoped HTO and (b) HTO-Al-2%.

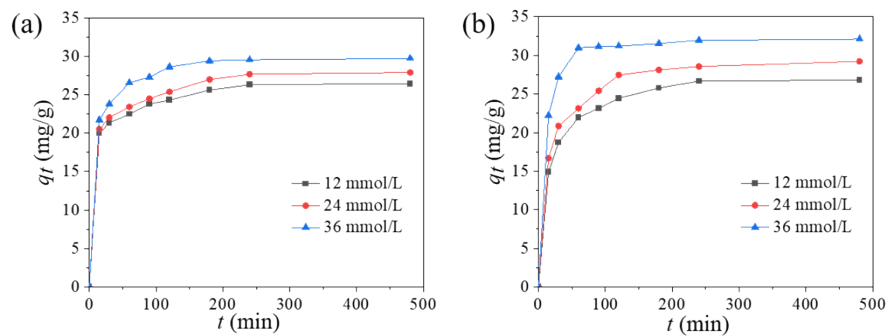

Fig. S3 Effect of different concentration on the  $\text{Li}^+$  adsorption capacity. (a) HTO; (b) HTO-Al-2%

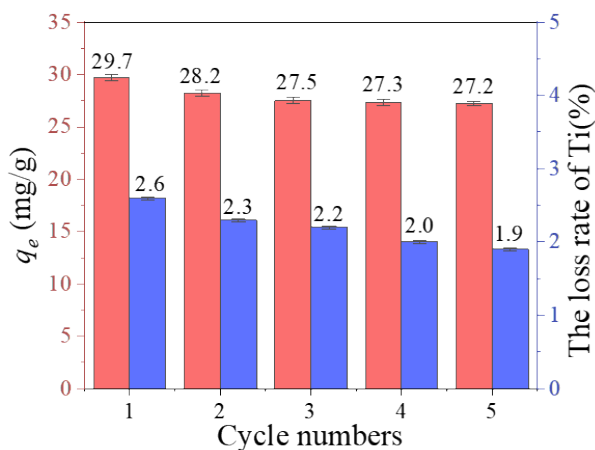

Fig. S4 The adsorption and Ti dissolution of HTO in each regeneration process.

Table S1 Selective adsorption of HTO-Al-2% in the mixed solution

| Metal ions    | $q_e$ (mmol/g) | $K_d$ (ml/g) | $\alpha_{\text{Li M}}$ |
|---------------|----------------|--------------|------------------------|
| $\text{Li}^+$ | 4.59           | 162.38       | 1.00                   |
| $\text{Na}^+$ | 0.21           | 5.83         | 27.85                  |
| $\text{K}^+$  | 0.28           | 7.86         | 20.66                  |
| $\text{Rb}^+$ | 0.15           | 4.13         | 39.32                  |
| $\text{Cs}^+$ | 0.28           | 7.90         | 20.55                  |
